# Supplementary material
Source: publisher figshare collection journal article supplement (https://tandf.figshare.com/ndownloader/files/34835744)
Supplement: Supplementary file 1 [file 34835744]

Supplementary File 2. Data Exaction Table

| **Main Category** | **Subcategory** | **Description** |
| --- | --- | --- |
| Number |  |  |
| Authors, Title and Year of publication |  |  |
| Aim |  | What was the purpose of the study? |
| Location, Country |  | Where was the study conducted? |
| Study Design |  | What was the overall design of the study? |
| Study Population | Target Population | Who are the participants in the study? |
| Sample Size | What was the actual sample size that was analysed for results |
| Context | Where was the study conducted? Academic institutions, clinics, community, etc. |
| Curriculum | Development | How curriculum was developed? What resources or frameworks were used? Who was involved in the process? What material was developed? |
| Integration | How was the curriculum integrated into the existing academic programme? What changes were made to the programme? |
| Delivery | How was the curriculum delivered to students or trainees (format, duration)? What methods were used? Who delivered the material? |
| Skills and Competencies | Skills | What specific abilities needed to perform safe and effective wheelchair service provision were taught? |
| Competencies | What knowledge and behaviours are necessary to be succesful in providing safe and effective wheelchair services? |
| Assessment | How were skills and competencies assessed? |
| Curriculum outcomes | Educational Effectiveness | What is the evidence for educational effectiveness ? How was it assessed? What tool was used? |
| Clinical Impact | Did the curriculum have any clinical impact? If so, how did it influence the needs of patients, healthcare profession personnel, students, and educators? How was this assessed? What tool was used? |
| Recommendations |  | What were the overall recommendations of the study? |
| Summary |  | What are the take-home messages? |
| Additional Comments |  | Any further comment on the article and its content |
